# Supplementary material for: Molecular evolution and depth‐related adaptations of rhodopsin in the adaptive radiation of cichlid fishes in Lake Tanganyika
Source: PubMed Central journal article supplement — Mol Ecol. 2022 Mar 30;31(10):2882–97. doi: 10.1111/mec.16429 (PMC9314932; doi:10.1111/mec.16429), 2022-03-30
Supplement: MEC-31-2882-s003.pdf [file MEC-31-2882-s003.pdf]

N-terminal

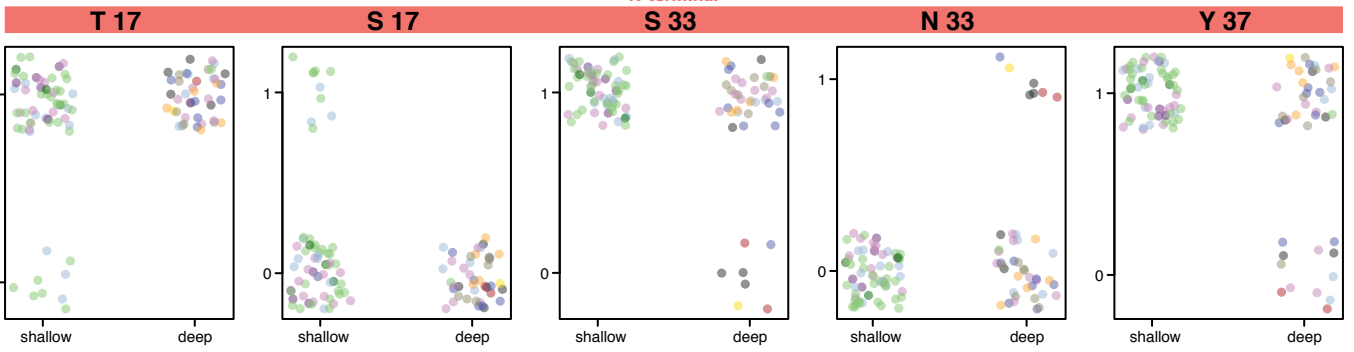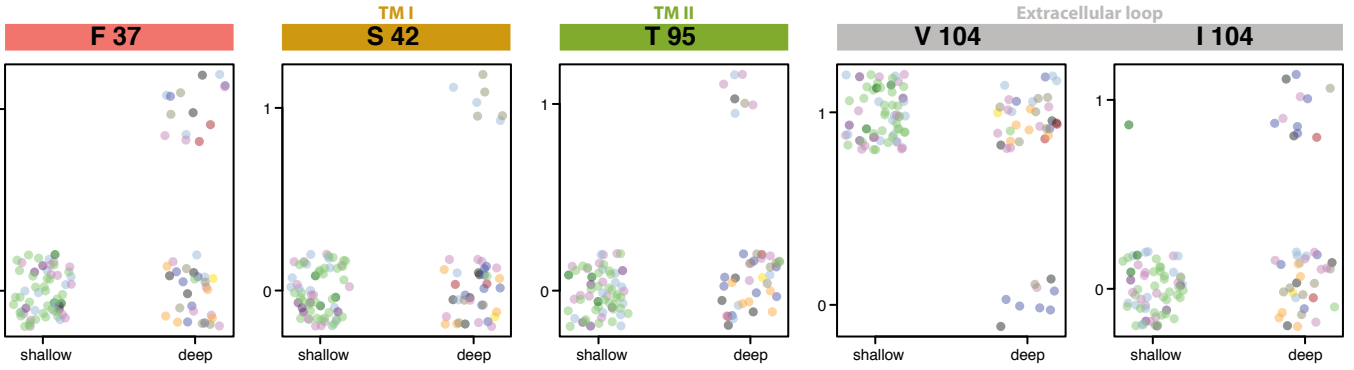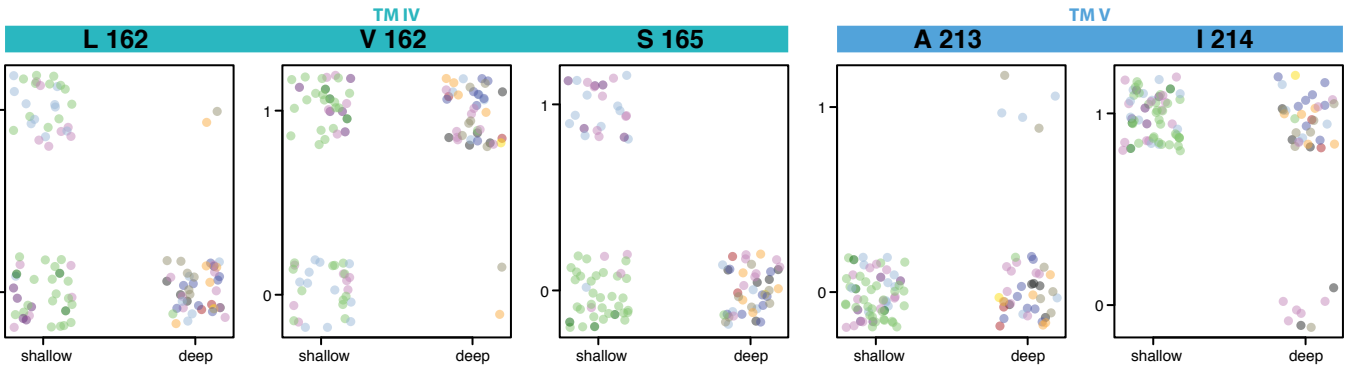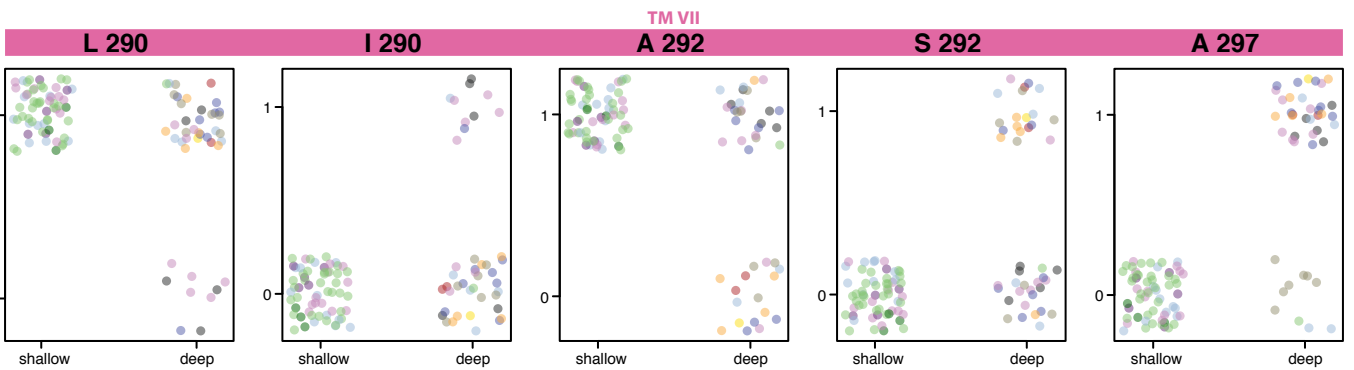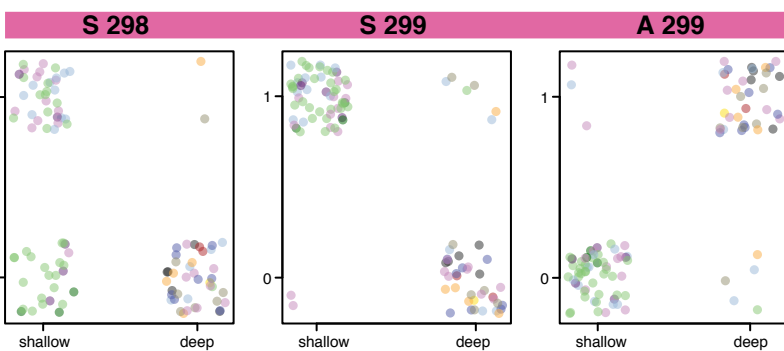

|       |                    |                 |
|-------|--------------------|-----------------|
| Tribe | Bathybatini        | Lamprologini    |
|       | Benthochromini     | Limnochromini   |
|       | Boulengerochromini | Oreochromini    |
|       | Cyphotilapiini     | Perissodini     |
|       | Cyprichromini      | Serranochromini |
|       | Ectodini           | Steatocranini   |
|       | Eretmodini         | Tilapiini       |
|       | Gobiocichlini      | Trematocarini   |
|       | Haplochromini      | Tropheini       |
|       | Heterotilapii      |                 |
