# Supplementary figures and images for: Molecular evolution and depth‐related adaptations of rhodopsin in the adaptive radiation of cichlid fishes in Lake Tanganyika
Source: PubMed Central journal article supplement — Mol Ecol. 2022 Mar 30;31(10):2882–97. doi: 10.1111/mec.16429 (PMC9314932; doi:10.1111/mec.16429), 2022-03-30

**A**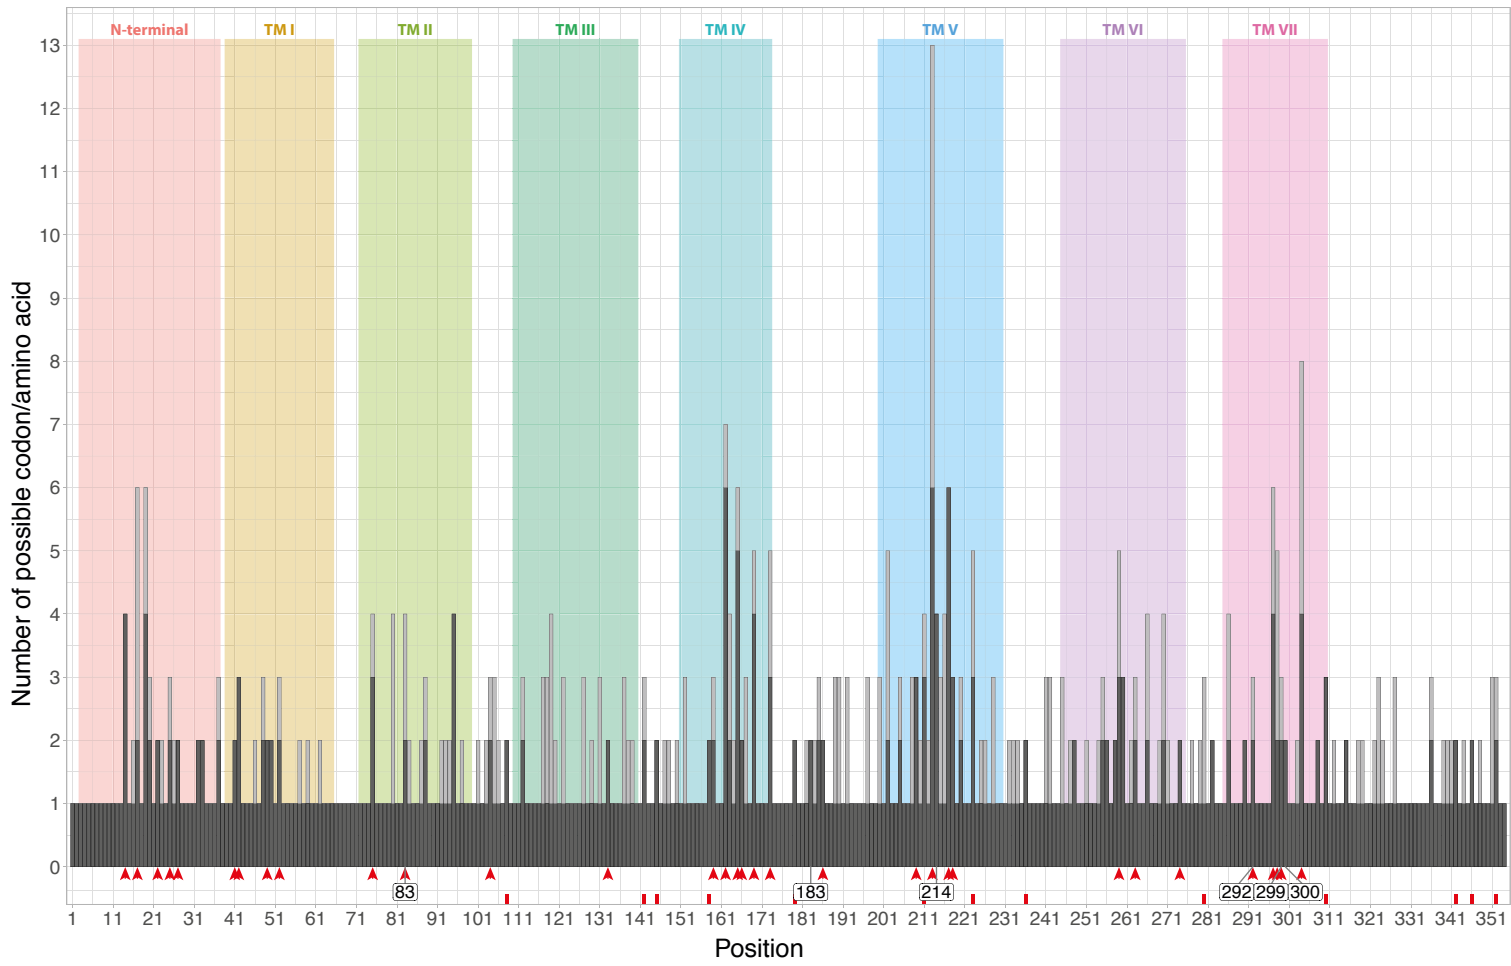**B**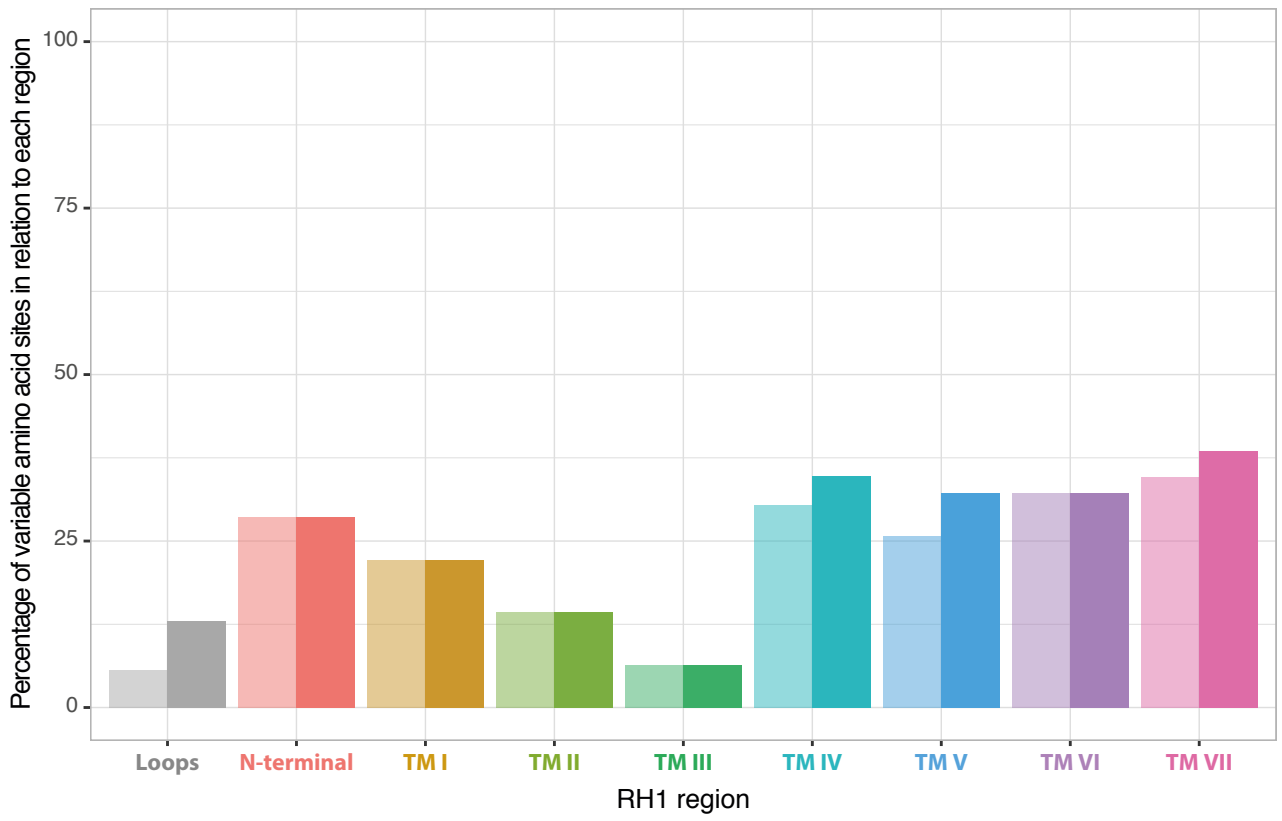

Homozygous variable sites  
 Homozygous variable sites including heterozygous sites

Supplement: MEC-31-2882-s002.pdf [file MEC-31-2882-s002.pdf]
